# Supplementary material for: Subtractive assembly for comparative metagenomics, and its application to type 2 diabetes metagenomes
Source: PubMed Central journal article supplement (PMC4630832; doi:10.1186/s13059-015-0804-0), 2015-11-02

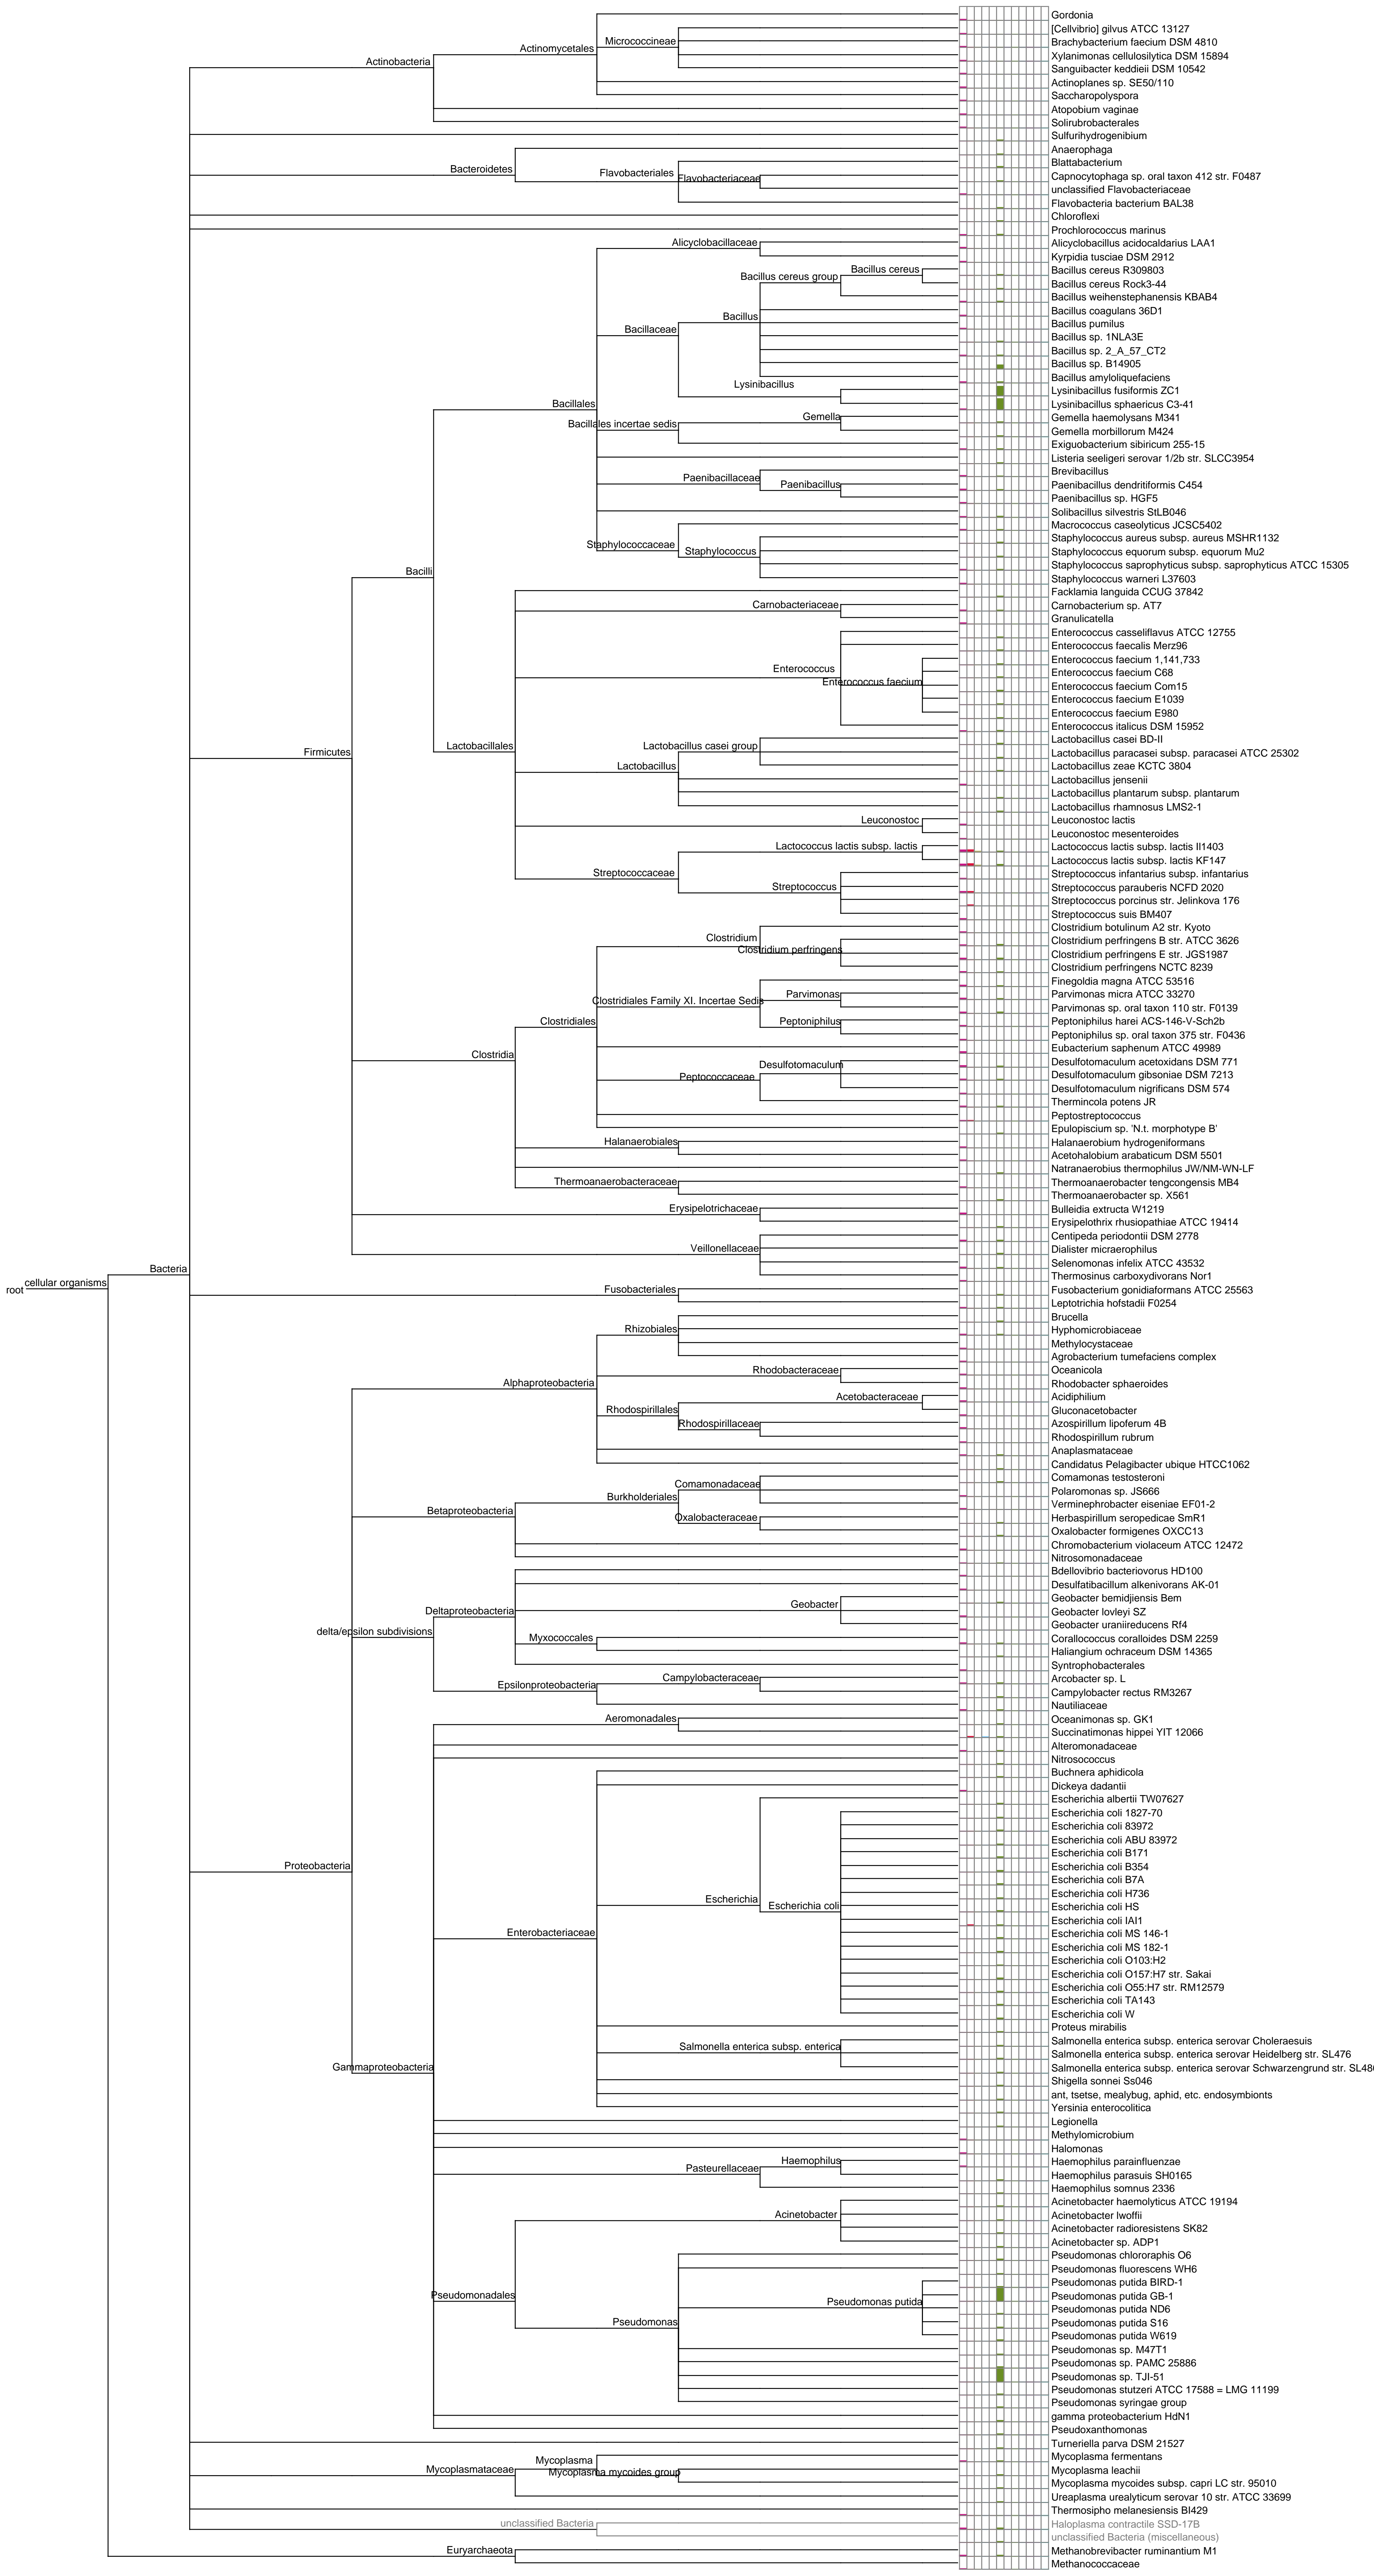

- Gordonia
- [Cellvibrio] gilvus ATCC 13127
- Brachy bacterium faecium DSM 4810
- Xylanimonas cellulolytica DSM 15894
- Sanguibacter keddiei DSM 10542
- Actinoplanes sp. SE50/110
- Saccharopolyspora
- Atopobium vaginae
- Solirubrobacterales
- Sulfurihydrogenibium
- Anaerophaga
- Blattbacterium
- Capnocytophaga sp. oral taxon 412 str. F0487
- unclassified Flavobacteriaceae
- Flavobacteria bacterium BAL38
- Chloroflexi
- Prochlorococcus marinus
- Alicyclobacillus acidocaldarius LA41
- Kyrpidia tusciae DSM 2912
- Bacillus cereus R309803
- Bacillus cereus Rock3-44
- Bacillus weihenstephanensis KBAB4
- Bacillus coagulans 36D1
- Bacillus pumilus
- Bacillus sp. 1NLA3E
- Bacillus sp. 2\_A\_57\_CT2
- Bacillus sp. B14905
- Bacillus amyloliquefaciens
- Lysinibacillus fusiformis ZC1
- Lysinibacillus sphaericus C3-41
- Gemella haemolysans M341
- Gemella morbillorum M424
- Exiguobacterium sibiricum 255-15
- Listeria seeligeri serovar 1/2b str. SLCC3954
- Brevibacillus
- Paenibacillus dendritiformis C454
- Paenibacillus sp. HGF5
- Solibacillus silvestris StLB046
- Macroccoccus caseolyticus JCSC5402
- Staphylococcus aureus subsp. aureus MSHR1132
- Staphylococcus equorum subsp. equorum Mu2
- Staphylococcus saprophyticus subsp. saprophyticus ATCC 15305
- Staphylococcus warneri L37603
- Facklamia languida CUG 37842
- Carnobacterium sp. AT7
- Granulicatella
- Enterococcus casseliflavus ATCC 12755
- Enterococcus faecalis Merz96
- Enterococcus faecium 1,141,733
- Enterococcus faecium C68
- Enterococcus faecium Com15
- Enterococcus faecium E1039
- Enterococcus faecium E980
- Enterococcus italicus DSM 15952
- Lactobacillus casei BD-II
- Lactobacillus paracasei subsp. paracasei ATCC 25302
- Lactobacillus zeae KCTC 3804
- Lactobacillus jensenii
- Lactobacillus plantarum subsp. plantarum
- Lactobacillus rhamnosus LMS2-1
- Leuconostoc lactis
- Leuconostoc mesenteroides
- Lactococcus lactis subsp. lactis I1403
- Lactococcus lactis subsp. lactis KF147
- Streptococcus infantarius subsp. infantarius
- Streptococcus parauberis NCFD 2020
- Streptococcus porcinus str. Jelinkova 176
- Streptococcus suis BM407
- Clostridium botulinum A2 str. Kyoto
- Clostridium perfringens B str. ATCC 3626
- Clostridium perfringens E str. JGS1987
- Clostridium perfringens NCTC 8239
- Finergoldia magna ATCC 53516
- Parvimonas micra ATCC 33270
- Parvimonas sp. oral taxon 110 str. F0139
- Peptoniphilus harei ACS-146-V-Sch2b
- Peptoniphilus sp. oral taxon 375 str. F0436
- Eubacterium saepenum ATCC 49899
- Desulfotomaculum acetoxidans DSM 771
- Desulfotomaculum gibsoniae DSM 7213
- Desulfotomaculum nigrificans DSM 574
- Thermicola potens JR
- Peptostreptococcus
- Epulopiscium sp. 'N.t. morphotype B'
- Halanaerobium hydrogeniformans
- Acetohalobium arabaticum DSM 5501
- Natranaerobius thermophilus JW/NM-WN-LF
- Thermoanaerobacter tengcongensis MB4
- Thermoanaerobacter sp. X561
- Bulleidia extracta W1219
- Erysipelothrix rhusiopathiae ATCC 19414
- Centipeda periodontii DSM 2778
- Dialister microaerophilus
- Selenomonas infelix ATCC 43532
- Thermosinus carboxydvorans Nor1
- Fusobacterium gonidialiformans ATCC 25563
- Leptotrichia hofstadii F0254
- Brucella
- Hyphomicrobiaceae
- Methylocystaceae
- Agrobacterium tumefaciens complex
- Oceanicola
- Rhodobacter sphaeroides
- Acidiphilium
- Gluconacetobacter
- Azospirillum lipoferum 4B
- Rhodospirillum rubrum
- Anaplasmataceae
- Candidatus Pelagibacter ubique HTCC1062
- Comamonas testosteroni
- Polaromonas sp. JS666
- Verminephrobacter eiseniae EF01-2
- Herbaspirillum seropedicae SmR1
- Oxalobacter formigenes OXCC13
- Chromobacterium violaceum ATCC 12472
- Nitrosomonadaceae
- Bdellovibrio bacteriovorus HD100
- Desulfatibacillum alkenivorans AK-01
- Geobacter bemidjensis Bem
- Geobacter lovleyi SZ
- Geobacter uraniireducens Rf4
- Coralloccoccus coralloides DSM 2259
- Haliangium ochraceum DSM 14365
- Syntrophobacterales
- Arcobacter sp. L
- Campylobacter rectus RM3267
- Nautiliaceae
- Oceanimonas sp. GK1
- Succinatimonas hippei YIT 12066
- Alteromonadaceae
- Nitrosococcus
- Buchnera aphidicola
- Dickeya dadantii
- Escherichia albertii TW07627
- Escherichia coli 1827-70
- Escherichia coli 83972
- Escherichia coli ABU 83972
- Escherichia coli B171
- Escherichia coli B354
- Escherichia coli B7A
- Escherichia coli H736
- Escherichia coli HS
- Escherichia coli IA1
- Escherichia coli MS 146-1
- Escherichia coli MS 182-1
- Escherichia coli O103:H2
- Escherichia coli O157:H7 str. Sakai
- Escherichia coli O55:H7 str. RM12579
- Escherichia coli TA143
- Escherichia coli W
- Proteus mirabilis
- Salmonella enterica subsp. enterica serovar Choleraesuis
- Salmonella enterica subsp. enterica serovar Heidelberg str. SL476
- Salmonella enterica subsp. enterica serovar Schwarzengrund str. SL480
- Shigella sonnei Ss046
- ant, tsetse, mealybug, aphid, etc. endosymbionts
- Yersinia enterocolitica
- Legionella
- Methylomicrobium
- Halomonas
- Haemophilus parainfluenzae
- Haemophilus parasuis SH0165
- Haemophilus somnus 2336
- Acinetobacter haemolyticus ATCC 19194
- Acinetobacter Iwoffii
- Acinetobacter radioresistens SK82
- Acinetobacter sp. ADP1
- Pseudomonas chlororaphis O6
- Pseudomonas fluorescens WH6
- Pseudomonas putida BIRD-1
- Pseudomonas putida GB-1
- Pseudomonas putida ND6
- Pseudomonas putida S16
- Pseudomonas putida W619
- Pseudomonas sp. M47T1
- Pseudomonas sp. PAMC 25886
- Pseudomonas sp. TJI-51
- Pseudomonas stutzeri ATCC 17588 = LMG 11199
- Pseudomonas syringae group
- gamma proteobacterium HdN1
- Pseudoxanthomonas
- Turneriella parva DSM 21527
- Mycoplasma fermentans
- Mycoplasma leachii
- Mycoplasma mycoides subsp. capri LC str. 95010
- Ureaplasma urealyticum serovar 10 str. ATCC 33699
- Thermosiphon melanesiensis B1429
- Haloplasma contractile SSD-17B
- unclassified Bacteria (miscellaneous)
- Methanobrevibacter ruminantium M1
- Methanococcaceae

Legend:

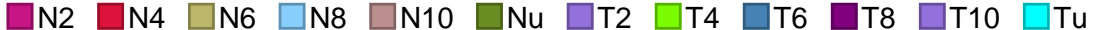

Supplement: 13059_2015_804_MOESM2_ESM.pdf [file 13059_2015_804_MOESM2_ESM.pdf]
