# Supplementary material for: Subtractive assembly for comparative metagenomics, and its application to type 2 diabetes metagenomes
Source: PubMed Central journal article supplement (PMC4630832; doi:10.1186/s13059-015-0804-0), 2015-11-02
Supplement: 13059_2015_804_MOESM1_ESM.pdf [file 13059_2015_804_MOESM1_ESM.pdf]

This document contains **Supplementary Table 1, Figure 1 and Figure 2.**

**Subtractive assembly for comparative metagenomics, and its application to type 2 diabetes metagenomes**

Mingjie Wang, Thomas G. Doak, Yuzhen Ye

**Supplementary Table 1.** Functional roles involved in the 'Fructooligosaccharides (FOS) and Raffinose Utilization' subsystem.

| Column | Abbrev | Functional Role                                                         | #Hits |
|--------|--------|-------------------------------------------------------------------------|-------|
| 1      | MsmR   | MSM (multiple sugar metabolism) operon regulatory protein               | 3     |
| 2      | MsmE   | Multiple sugar ABC transporter, substrate-binding protein               | 8     |
| 3      | MsmF   | Multiple sugar ABC transporter, membrane-spanning permease protein MsmF | 4     |
| 4      | MsmG   | Multiple sugar ABC transporter, membrane-spanning permease protein MsmG | 4     |
| 5      | MsmK   | Multiple sugar ABC transporter, ATP-binding protein                     | 6     |
| 6      | SacA   | Sucrose-6-phosphate hydrolase (EC 3.2.1.B3)                             | 10    |
| 7      | GtfA   | Sucrose phosphorylase (EC 2.4.1.7)                                      | 8     |
| 8      | DexB   | Glucan 1,6-alpha-glucosidase (EC 3.2.1.70)                              | 0     |
| 9      | RafR   | Raffinose operon transcriptional regulatory protein RafR                | 0     |
| 10     | RafB   | Raffinose permease                                                      | 0     |
| 11     | LacY   | Lactose permease                                                        | 0     |
| 12     | Aga    | Alpha-galactosidase (EC 3.2.1.22)                                       | 20    |
| 13     | yesM   | Two-component sensor kinase YesM (EC 2.7.3.-)                           | 5     |
| 14     | Man    | Alpha-mannosidase (EC 3.2.1.24)                                         | 5     |
| 15     | BG     | Beta-glucosidase (EC 3.2.1.21)                                          | 30    |
| 16     | Hyl    | Hyaluronoglucosaminidase (EC 3.2.1.35)                                  | 0     |

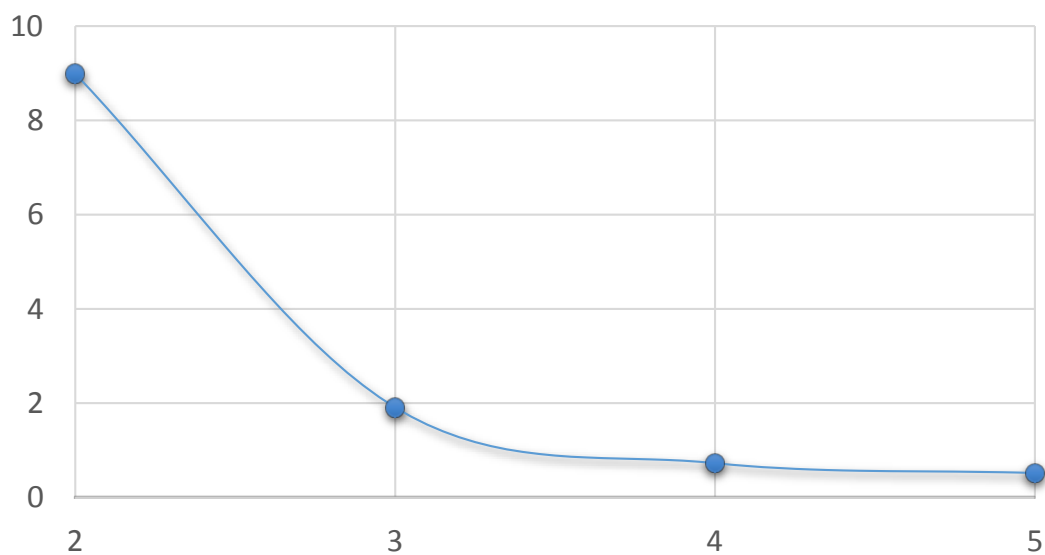

**Supplementary Figure 1.** Percentage of extracted reads from non-differential genomes by subtractive assembly on S1 vs. S2 in Group 2 of Simulation 1 (see Table 1 for more information). The x-axis shows the values of  $k$ -mer ratio parameter  $r$  (2 to 5) and y-axis shows the fraction (%) of reads from non-differential genomes in the extracted reads.

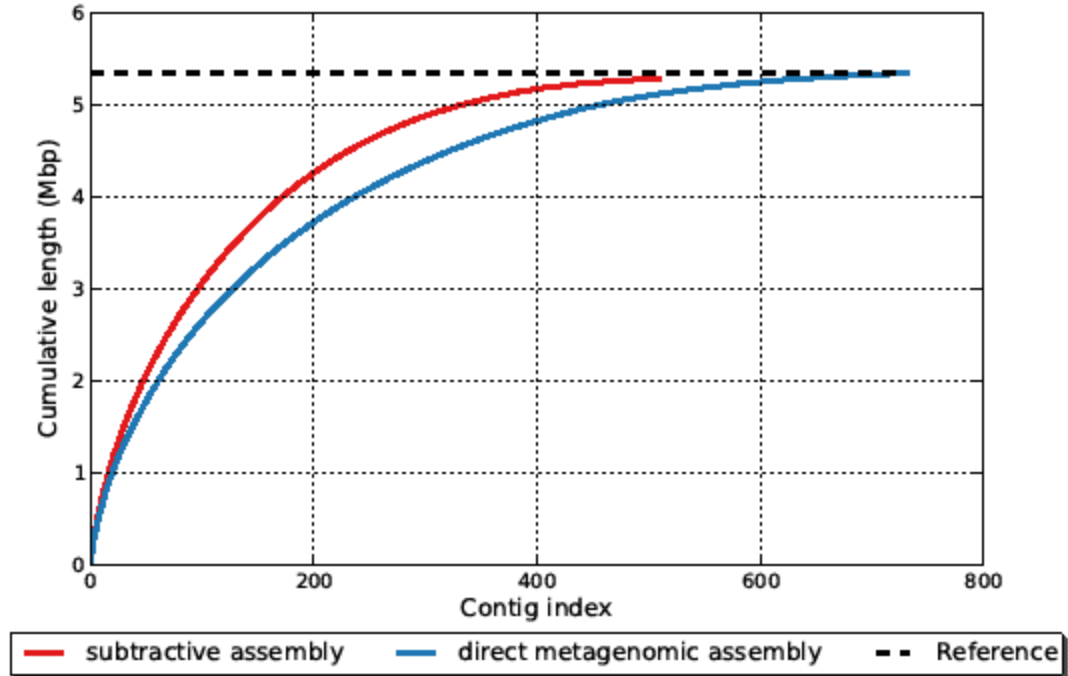

**Supplementary Figure 2.** Comparison of the cumulative contig length between subtractive assembly (red) and direct assembly (blue) of *R. palustris* HaA2 (Simulation 2) by using MEGAHIT as the assembler. On the x-axis, contigs are ordered from largest to smallest. The y-axis gives the size of the x largest contigs in the assembly.
