# Supplementary material for: Subtractive assembly for comparative metagenomics, and its application to type 2 diabetes metagenomes
Source: PubMed Central journal article supplement (PMC4630832; doi:10.1186/s13059-015-0804-0), 2015-11-02
Supplement: 13059_2015_804_MOESM3_ESM.pdf [file 13059_2015_804_MOESM3_ESM.pdf]

Legend:
